# Supplementary material for: Screening for resistance to four fungal diseases and associated genomic regions in a snap bean diversity panel
Source: Frontiers journal article supplement (doi:10.3389/fpls.2024.1386877), 2024-06-11
Supplement: Presentation_1.pdf [file Presentation_1.pdf]

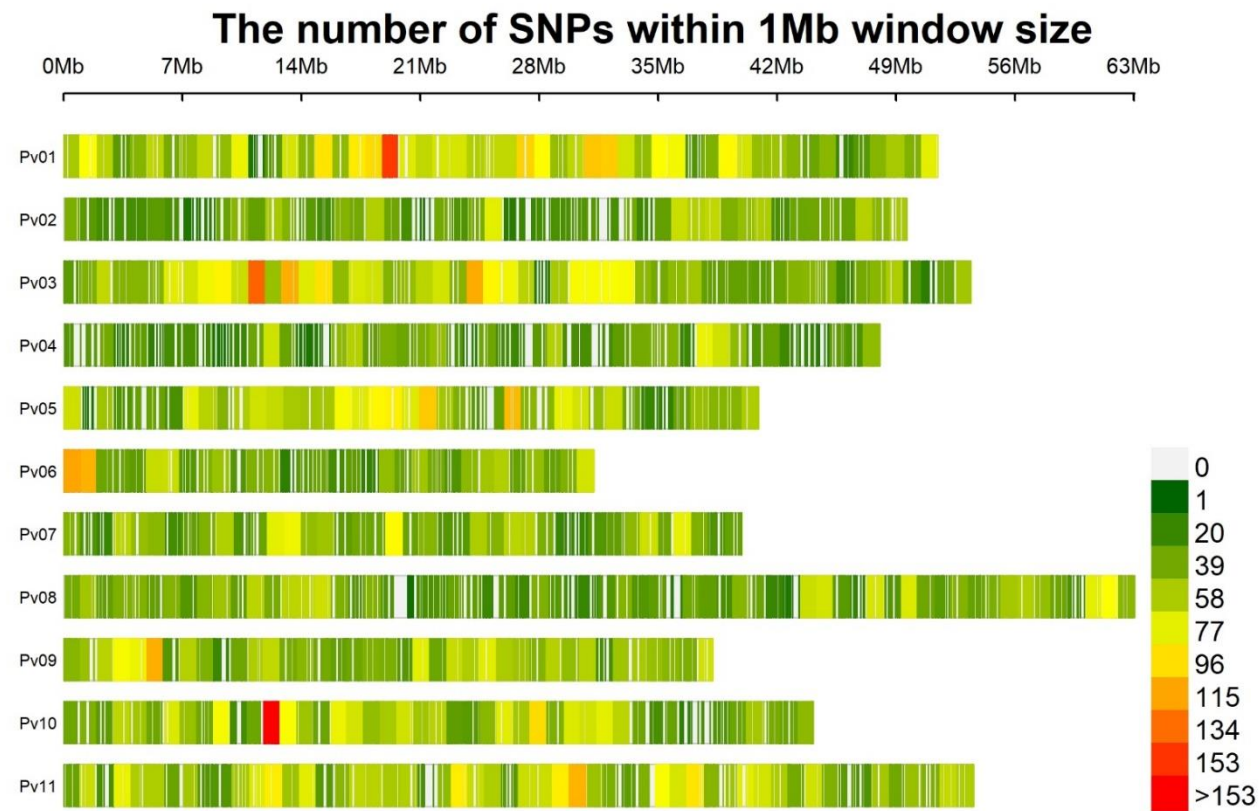

**Supplementary Figure S1.** Distribution along the eleven bean chromosomes of the 16,242 SNPs considered after filtering for the Genome-wide association study conducted in the Snap Bean Panel
