# Supplementary material for: Screening for resistance to four fungal diseases and associated genomic regions in a snap bean diversity panel
Source: Front Plant Sci. 2024 Jun 11;15:1386877. doi: 10.3389/fpls.2024.1386877 (PMC11196787; doi:10.3389/fpls.2024.1386877)
Supplement: Supplementary file 1 [file Table_1.xlsx]

## Sheet: Table S1
Supplementary Table S1. Common bean lines included in the Snap Bean Panel (SBP) and their respective SBP code. The cultivar name from each line is derived is indicated. Response of each line against the different evaluated isolates is indicated: Colletotrichum lindemuthianum isolates CL18, CL124, and C531; WM, white mold; PM, powdery mildew; Py, Pythium ultimum. Main morphologic traits for plant,…
					DISEASE EVALUATION							PLANT MORPHOLOGIC TRAITS				POD MORPHOLOGIC TRAITS					SEED MORPHOLOGIC TRAITS
					Isolates							Plant traits				Pod traits					Seed traits
	SBP code	Cultivar Name	DOI number	Type of line	CL124	CL18	C531	WM	PM	Py		Growth habit	wing color	Standard color		pod lenght	pod cross-section	pod color	Curvature		Primary seed color	Secondary seed color	Shine	Longitudinal shape	Transversal shape	Seed size
1	SBP_002	CONTENDER	10.18730/SC0M7	commercial	S	S	S	S	S	R		determinate erect	purple	purple		long	pear	green	curved		cream	brown	shiny	kidney	round	large
2	SBP_003	MANTECA DE LOS MERCADOS	10.18730/SC0N8	commercial	R	R	S	S	S	I		determinate erect	purple	purple		long	pear	yellow	straight		black	-	shiny	oblong cylindric	round	small
3	SBP_004	ILERDA	10.18730/SC0P9	commercial	S	S	S	S	S	S		determinate erect	white	white		medium	eight	yellow	-		white	-	medium	cuboid	round	small
4	SBP_005	BINA	10.18730/SC0QA	commercial	R	R	S	S	R	S		determinate erect	white	white		medium	flat	green	straight		white	-	matt	oval	round	small
5	SBP_006	BUENOS AIRES ROJA	10.18730/SC0RB	commercial	S	S	S	S	I	S		Indeterminate climbing	white	white		long	flat	mottled green	straight		brown	dark brown	shiny	kidney	half full	large
6	SBP_007	BOCA DE DRAGON	10.18730/SBCAQ	commercial	S	S	S	S	S	R		determinate erect	purple	purple		medium	flat	mottled yellow	curved		brown	dark brown	medium	kidney	half full	large
7	SBP_008	PATXI	10.18730/SC0SC	commercial	R	R	S	I	I	S		Indeterminate climbing	white	white		Very long	flat	yellow	straight		white	-	matt	oval	half full	small
8	SBP_010	GARRAFAL ORO	10.18730/SBC1E	commercial	S	S	R	I	S	I		Indeterminate climbing	lilac	lilac		long	pear	green	curved		cream	-	shiny	kidney	half full	large
9	SBP_011	MUSICA	10.18730/SBC0D	commercial	S	S	S	I	S	S		Indeterminate climbing	white	white		Very long	flat	green	straight		white	-	matt	oval	half full	medium
10	SBP_012	GOLDMARIE	10.18730/SC0TD	commercial	R	R	S	I	S	S		Indeterminate climbing	white	white		Very long	flat	yellow	straight		white	-	matt	oval	half full	small
11	SBP_013	MARCONI	10.18730/SC0VE	commercial	S	R	R	I	I	S		Indeterminate climbing	white	white		Very long	flat	green	straight		white	-	matt	kidney	half full	medium
12	SBP_014	PERFECCION NEGRA POLO	10.18730/SBC8N	commercial	S	S	S	I	S	S		Indeterminate climbing	purple	purple		long	eliptic/ round	green	curved		black	-	shiny	kidney	round	medium
13	SBP_015	BILMA	10.18730/SC0WF	commercial	R	R	S	R	I	S		Indeterminate climbing	white	white		Very long	flat	green	straight		white	-	matt	kidney	half full	medium
14	SBP_016	GARRAFAL ENANA	10.18730/SC0XG	commercial	S	S	S	I	I	I		determinate -	lilac	lilac		long	flat	green	straight		cream	-	shiny	kidney	round	large
15	SBP_017	NASSAU	10.18730/SC0YH	commercial	R	S	R	I	S	S		determinate erect	white	white		long	flat	green	straight		white	-	medium	oval	half full	medium
16	SBP_018	AMARILLA CAPITANO	10.18730/SC0ZJ	commercial	R	R	S	S	S	S		determinate erect	purple	purple		long	eliptic/ round	green	curved		white	-	medium	oval	half full	medium
17	SBP_019	SUPERBA	10.18730/SC10K	commercial	S	S	S	I	S	S		determinate erect	white	white		long	flat	green	straight		white	-	medium	oval	half full	medium
18	SBP_020	AMETHYST	10.18730/SC11M	commercial	S	S	S	S	S	I		determinate erect	purple	purple		long	eliptic/ round	purple	curved		cream	-	shiny	kidney	half full	medium
19	SBP_021	NURIA	10.18730/SC12N	commercial	S	S	S	I	I	R		Indeterminate climbing	white	white		long	flat	green	straight		cream	brown	medium	kidney	round	large
20	SBP_022	MONEL	10.18730/SC13P	commercial	R	R	S	S	I	S		determinate climbing	purple	purple		long	eight	green	curved		black	-	shiny	kidney	round	medium
21	SBP_023	FIN DE BAGNOLS	10.18730/SC14Q	commercial	S	S	-	-	-	-		Indeterminate climbing	purple	purple		medium	flat	green	straight		dark brown	brown	matt	kidney	round	medium
22	SBP_024	BEURRE DE ROCQUENCOURT	10.18730/SBC5J	commercial	S	S	S	S	S	I		determinate erect	purple	purple		long	eliptic/ round	yellow	straight		black	-	shiny	oblong cylindric	round	medium
23	SBP_025	GLOIRE DE SAUMUR	10.18730/SC15R	commercial	S	S	S	S	S	S		determinate climbing	purple	purple		long	pear	green	straight		black	-	shiny	kidney	round	medium
24	SBP_026	BROWN DUTCH	10.18730/SBC6K	commercial	R	R	R	S	I	I		determinate erect	white	white		Short	flat	green	straight		cream	-	medium	oval	round	medium
25	SBP_027	DUBLETTE	10.18730/SC16S	commercial	S	S	R	I	I	S		determinate erect	white	white		long	pear	green	curved		white	-	medium	kidney	round	medium
26	SBP_028	PINZESSA	10.18730/SC17T	commercial	R	R	R	-	S	S		determinate erect	white	white		medium	eight	green	curved		white	-	matt	oblong cylindric	round	small
27	SBP_029	BLUEVETTA	10.18730/SC18V	commercial	R	R	R	S	I	S		determinate erect	purple	purple		medium	eight	purple	straight		cream	-	medium	oblong cylindric	round	small
28	SBP_030	BLAUHILDE	10.18730/SC19W	commercial	S	S	S	I	I	S		Indeterminate climbing	purple	purple		Very long	pear	purple	re-curved		cream	-	medium	kidney	flat	medium
29	SBP_031	NECKARGOLD	10.18730/SC1AX	commercial	S	S	S	R	S	S		Indeterminate climbing	white	white		medium	pear	green	straight		white	-	matt	kidney	flat	medium
30	SBP_032	DUPLIKA	10.18730/SC1BY	commercial	R	R	R	I	S	S		determinate erect	white	white		medium	eliptic/ round	green	straight		white	-	matt	oval	flat	small
31	SBP_033	GOLDEN TEEPEE	10.18730/SC1CZ	commercial	S	R	R	I	I	S		determinate postrate	white	white		long	pear	yellow	straight		white	-	matt	kidney	flat	medium
32	SBP_034		10.18730/SC1D*	landrace	S	S	S	S	S	I		Indeterminate climbing	white	white		long	pear	green	straight		dark brown	-	shiny	oval	round	small
33	SBP_035		10.18730/SC1E~	landrace	S	S	S	I	S	S		Indeterminate climbing	lilac	lilac		Short	eight	green	curved		white	-	matt	oval	flat	small
34	SBP_036		10.18730/SC1F$	landrace	R	R	R	R	S	I		Indeterminate climbing	white	white		long	flat	green	re-curved		dark brown	-	shiny	kidney	round	large
35	SBP_037		10.18730/SC1G=	landrace	S	S	S	R	I	I		Indeterminate postrate	lilac	lilac		Short	flat	yellow	straight		dark brown	-	shiny	oval	round	medium
36	SBP_038		10.18730/SC1HU	landrace	S	S	S	R	I	S		Indeterminate climbing	lilac	lilac		Short	flat	yellow	straight		dark brown	-	shiny	oval	round	medium
37	SBP_039		10.18730/SC1J0	landrace	S	S	S	S	S	S		determinate postrate	white	white		medium	flat	green	straight		white	-	matt	kidney	round	medium
38	SBP_040		10.18730/SC1K1	landrace	S	S	S	I	S	S		determinate erect	lilac	lilac		long	flat	green	straight		purple	-	medium	kidney	round	large
39	SBP_041		10.18730/SC1M2	landrace	S	S	S	I	S	I		Indeterminate climbing	lilac	lilac		long	pear	yellow	curved		cream	-	shiny	kidney	flat	large
40	SBP_042	ROYAL BURGUNDY	10.18730/SC1N3	commercial	S	S	S	I	S	I		determinate erect	purple	purple		medium	pear	purple	re-curved		cream	-	shiny	kidney	round	medium
41	SBP_043	CUPIDON	10.18730/SC1P4	commercial	R	R	R	S	I	I		determinate erect	white	white		medium	eight	green	curved		brown	cream	shiny	oblong cylindric	round	small
42	SBP_044	LAZY HOUSEWIFE	10.18730/SC1Q5	commercial	S	S	S	I	S	S		Indeterminate climbing	white	white		Short	flat	green	straight		white	-	medium	ROUND	round	small
43	SBP_045	AIDA GOLD	10.18730/SC1R6	commercial	R	R	S	S	S	S		determinate erect	white	white		Short	eight	yellow	straight		white	-	medium	kidney	round	small
44	SBP_046	AQUILON	10.18730/SC1S7	commercial	R	R	S	I	S	I		determinate postrate	purple	purple		Very long	eight	green	curved		black	-	shiny	oblong cylindric	round	medium
45	SBP_048	CHEROKEE TRAIL OF TEARS	10.18730/SC1T8	commercial	S	R	R	S	I	I		Indeterminate climbing	purple	purple		medium	eight	green	straight		black	-	shiny	kidney	round	medium
46	SBP_049	HILADORA	10.18730/SC1V9	commercial	R	S	S	S	S	S		determinate erect	white	white		medium	eliptic/ round	yellow	curved		white	-	matt	kidney	round	small
47	SBP_051	QUEEN	10.18730/SC1WA	commercial	S	S	S	I	S	I		determinate erect	purple	purple		medium	pear	purple	curved		dark brown	cream	shiny	kidney	round	medium
48	SBP_053	VIOLETTE	10.18730/SC1XB	commercial	S	R	R	R	I	S		Indeterminate climbing	purple	purple		medium	pear	purple	straight		cream	-	shiny	kidney	flat	small
49	SBP_054	NECKARKONIGIN	10.18730/SC1YC	commercial	S	S	S	I	I	S		Indeterminate climbing	white	white		Very long	pear	yellow	straight		white	-	matt	kidney	flat	small
50	SBP_056	SPEEDY	10.18730/SC1ZD	commercial	R	R	S	-	I	S		determinate erect	white	white		medium	eight	green	curved		white	-	matt	kidney	round	very small
51	SBP_057	NOMAD	10.18730/SC20E	commercial	R	R	R	S	S	S		determinate erect	white	white		medium	eight	green	straight		white	-	matt	oval	round	very small
52	SBP_058	SONESTA	10.18730/SC21F	commercial	R	R	R	S	S	S		determinate erect	white	white		medium	pear	yellow	straight		white	-	matt	kidney	round	small
53	SBP_059	CONCADOR	10.18730/SC22G	commercial	R	R	R	S	S	S		determinate erect	white	white		long	eliptic/ round	yellow	curved		white	-	matt	oblong cylindric	round	very small
54	SBP_060	DULCINA	10.18730/SC23H	commercial	S	S	S	S	S	S		determinate erect	white	white		medium	flat	green	straight		white	-	matt	cuboid	round	medium
55	SBP_061	OPERA	10.18730/SC24J	commercial	R	R	R	S	S	S		determinate erect	white	white		medium	pear	green	straight		white	-	matt	ROUND	round	very small
56	SBP_062	MASCOTTE	10.18730/SC25K	commercial	R	R	R	I	-	S		determinate -	white	white		medium	flat	green	straight		white	-	matt	oblong cylindric	round	very small
57	SBP_063	SPENDIDO	10.18730/SC26M	commercial	R	S	-	I	S	I		determinate postrate	lilac	lilac		medium	flat	mottled green	straight		cream	purple	shiny	oval	flat	medium
58	SBP_064	FASOLD	10.18730/SC27N	commercial	S	S	S	I	S	S		Indeterminate climbing	purple	purple		Very long	eight	green	curved		black	-	medium	oblong cylindric	round	medium
59	SBP_065	THE PRINCE	10.18730/SC28P	commercial	S	S	S	I	I	S		determinate erect	lilac	lilac		medium	flat	green	straight		dark brown	cream	medium	kidney	round	medium
60	SBP_066	SAFARI	10.18730/SC29Q	commercial	R	-	R	S	S	S		determinate erect	white	white		Short	eliptic/ round	green	straight		white	-	matt	cuboid	round	very small
61	SBP_067	CASTANDEL	10.18730/SC2AR	commercial	R	R	R	I	S	S		determinate postrate	white	white		medium	eight	green	straight		dark brown	cream	matt	oblong cylindric	round	small
62	SBP_068	MAXI	10.18730/SC2BS	commercial	S	S	R	I	I	I		determinate -	lilac	lilac		long	pear	green	straight		cream	-	matt	kidney	round	medium
63	SBP_070		10.18730/H7QGQ	unknown	R	R	R	S	-	I		determinate postrate	purple	purple		Short	flat	green	straight		black	-	matt	oval	flat	small
64	SBP_071		10.18730/H7XW5	unknown	R	S	R	S	I	I		determinate erect	lilac	lilac		medium	flat	green	straight		cream	-	shiny	kidney	round	medium
65	SBP_072		10.18730/H7YHT	unknown	S	S	-	I	S	R		determinate postrate	white	white		Short	flat	green	straight		brown	-	shiny	oval	flat	medium
66	SBP_073		10.18730/H81C6	unknown	S	S	S	I	S	I		determinate erect	white	white		medium	flat	green	straight		dark brown	white	shiny	kidney	round	medium
67	SBP_076		10.18730/H81JC	unknown	S	S	S	S	S	S		determinate erect	white	white		Short	flat	yellow	straight		white	-	matt	oval	round	small
68	SBP_077		10.18730/H828$	unknown	S	S	S	S	S	I		determinate erect	purple	purple		long	eliptic/ round	green	curved		cream	-	matt	kidney	round	large
69	SBP_078		10.18730/H82D2	unknown	S	S	S	S	S	I		determinate erect	lilac	lilac		medium	flat	green	curved		dark brown	-	shiny	kidney	round	medium
70	SBP_079		10.18730/H82E3	unknown	R	S	S	S	-	S		determinate postrate	lilac	lilac		long	flat	green	straight		purple	-	shiny	kidney	round	medium
71	SBP_080		10.18730/H7P2E	unknown	S	S	S	S	S	I		determinate -	lilac	lilac		medium	pear	yellow	straight		brown	-	shiny	kidney	round	medium
72	SBP_081		10.18730/H7PAP	unknown	S	S	S	S	I	R		determinate postrate	lilac	lilac		medium	eight	green	straight		dark brown	cream	shiny	cuboid	round	medium
73	SBP_082		10.18730/H7PJY	unknown	S	S	R	R	S	R		Indeterminate climbing	lilac	lilac		medium	flat	green	curved		red	-	shiny	kidney	round	medium
74	SBP_083	MIDAS	10.18730/H7QCK	unknown	S	S	S	S	S	S		determinate postrate	white	white		Short	pear	yellow	straight		white	-	matt	oval	flat	small
75	SBP_085		10.18730/H7VG3	unknown	S	S	S	S	S	I		determinate postrate	lilac	lilac		medium	flat	green	straight		cream	-	matt	kidney	round	medium
76	SBP_086		10.18730/H7XV4	unknown	R	S	S	S	I	R		determinate erect	purple	purple		Short	pear	yellow	straight		black	-	medium	oval	round	small
77	SBP_087		10.18730/H7XY7	unknown	S	S	S	I	S	S		Indeterminate climbing	white	white		very long	flat	green	straight		white	-	matt	kidney	flat	medium
78	SBP_089		10.18730/H7Y8H	unknown	S	S	S	I	I	I		Indeterminate climbing	lilac	lilac		Very long	flat	green	curved		red	-	medium	kidney	round	medium
79	SBP_090		10.18730/H7YEQ	unknown	S	S	S	I	S	S		determinate erect	lilac	lilac		medium	pear	yellow	straight		brown	-	shiny	cuboid	round	small
80	SBP_091		10.18730/H7YKW	unknown	S	S	R	I	I	R		determinate postrate	white	white		medium	flat	green	straight		brown	-	matt	cuboid	round	small
81	SBP_092		10.18730/H7YR~	unknown	S	S	S	I	I	I		Indeterminate climbing	lilac	lilac		long	pear	yellow	straight		brown	-	matt	kidney	round	medium
82	SBP_093		10.18730/H7YS$	unknown	S	S	S	I	I	S		Indeterminate climbing	purple	purple		medium	flat	yellow	straight		purple	-	matt	oval	flat	small
83	SBP_094		10.18730/H7YY2	unknown	S	S	S	S	I	S		determinate -	purple	purple		medium	flat	yellow	straight		black	-	shiny	kidney	flat	medium
84	SBP_095		10.18730/H7Z6A	unknown	S	R	R	S	I	S		Indeterminate climbing	white	white		medium	flat	green	curved		white	-	matt	kidney	flat	medium
85	SBP_096		10.18730/H7ZKQ	unknown	R	R	R	I	S	I		Indeterminate climbing	purple	purple		Very long	flat	purple	straight		cream	-	matt	kidney	flat	large
86	SBP_097		10.18730/H8043	unknown	R	R	S	S	I	S		determinate erect	white	white		medium	pear	yellow	straight		white	-	matt	cuboid	round	small
87	SBP_098		10.18730/H80CB	unknown	S	S	R	I	S	I		determinate postrate	white	white		medium	flat	yellow	curved		dark brown	white	shiny	kidney	round	medium
88	SBP_099		10.18730/H80DC	unknown	S	S	S	S	I	I		determinate postrate	purple	purple		long	pear	green	curved		brown	-	shiny	oblong cylindric	round	large
89	SBP_100		10.18730/H80YX	unknown	S	S	S	I	I	I		Indeterminate climbing	lilac	lilac		long	flat	green	straight		black	-	shiny	kidney	flat	medium
90	SBP_101		10.18730/H80ZY	unknown	R	S	S	R	I	I		Indeterminate climbing	white	white		Very long	flat	green	straight		dark brown	-	matt	kidney	flat	large
91	SBP_103		10.18730/H8182	unknown	S	S	S	I	I	S		determinate postrate	lilac	lilac		medium	pear	yellow	straight		cream	-	shiny	cuboid	round	medium
92	SBP_104		10.18730/H81F9	unknown	S	S	S	S	S	R		determinate erect	lilac	lilac		medium	eliptic/ round	yellow	curved		dark brown	-	shiny	kidney	round	medium
93	SBP_105		10.18730/H81QH	unknown	R	S	S	I	I	I		determinate postrate	lilac	lilac		Short	flat	green	straight		cream	-	matt	kidney	round	large
94	SBP_106		10.18730/H81XQ	unknown	R	R	R	S	I	S		determinate erect	white	white		medium	flat	green	straight		white	-	matt	kidney	round	medium
95	SBP_108		10.18730/H825Z	unknown	S	S	S	S	S	I		determinate postrate	lilac	lilac		long	flat	green	straight		red	-	medium	kidney	round	medium
96	SBP_109		10.18730/H826*	unknown	S	S	S	S	S	-		determinate postrate	purple	purple		medium	pear	yellow	curved		black	-	shiny	oblong cylindric	flat	medium
97	SBP_110		10.18730/H829=	unknown	R	R	S	S	S	S		determinate erect	lilac	lilac		medium	eight	green	straight		dark brown	cream	medium	cuboid	round	medium
98	SBP_112		10.18730/H82G5	unknown	S	S	S	I	S	R		determinate erect	lilac	lilac		Short	flat	yellow	straight		brown	-	shiny	oval	round	small
99	SBP_113		10.18730/H82H6	unknown	S	S	S	S	S	R		determinate erect	lilac	lilac		long	eliptic/ round	green	curved		cream	brown	shiny	kidney	flat	very small
100	SBP_114		10.18730/H82M9	unknown	S	S	S	I	S	S		determinate erect	lilac	lilac		medium	flat	yellow	straight		brown	-	shiny	kidney	round	medium
101	SBP_115		10.18730/H82NA	unknown	S	S	R	S	S	R		determinate erect	purple	purple		Short	flat	yellow	straight		black	-	shiny	oval	round	small
102	SBP_116		10.18730/H838X	unknown	S	S	S	S	S	R		Indeterminate postrate	purple	purple		medium	eliptic/ round	green	straight		dark brown	cream	medium	oval	round	small
103	SBP_117		10.18730/H83Q7	unknown	S	S	S	I	I	S		Indeterminate climbing	purple	purple		long	flat	yellow	straight		brown	dark brown	matt	kidney	flat	medium
104	SBP_118		10.18730/H83R8	unknown	S	S	S	R	S	I		Indeterminate climbing	purple	purple		Short	pear	yellow	curved		purple	brown	shiny	cuboid	round	medium
105	SBP_120		10.18730/H847Q	unknown	S	S	S	R	S	S		Indeterminate climbing	white	white		medium	eight	green	straight		white	-	matt	oval	flat	small
106	SBP_121		10.18730/H84EY	unknown	S	S	S	I	I	I		Indeterminate climbing	purple	purple		Short	flat	yellow	straight		black	-	medium	oval	round	small
107	SBP_122		10.18730/H84MU	unknown	R	S	R	I	S	I		Indeterminate climbing	purple	purple		medium	flat	yellow	straight		dark brown	-	medium	oval	flat	medium
108	SBP_123		10.18730/H84R3	unknown	S	R	R	I	I	S		Indeterminate climbing	lilac	lilac		Very long	flat	green	straight		white	-	matt	kidney	flat	medium
109	SBP_125		10.18730/H851C	unknown	S	S	S	I	S	S		Indeterminate climbing	lilac	lilac		Very long	flat	yellow	curved		brown	-	shiny	kidney	round	medium
110	SBP_126		10.18730/H853E	unknown	R	R	S	I	I	R		Indeterminate climbing	lilac	lilac		long	flat	mottled green	straight		brown	dark brown	shiny	kidney	flat	medium
111	SBP_127		10.18730/H85DR	unknown	S	S	S	I	S	S		Indeterminate climbing	-	-		medium	flat	yellow	-		dark brown	-	matt	kidney	flat	medium
112	SBP_129	ARRAS	10.18730/SC2CT	commercial	R	R	R	S	S	S		determinate erect	white	white		Short	eight	green	straight		white	-	matt	cuboid	flat	very small
113	SBP_130	BAMAKO	10.18730/SC2DV	commercial	R	R	R	S	I	S		determinate -	white	white		medium	eliptic/ round	yellow	curved		white	-	medium	cuboid	round	very small
114	SBP_131	BOOSTER	10.18730/SC2EW	commercial	R	R	R	S	S	S		determinate erect	white	white		Short	eight	green	straight		white	-	matt	oblong cylindric	flat	very small
115	SBP_132	BORSALINO	10.18730/SC2FX	commercial	R	R	R	S	S	S		determinate -	white	white		medium	eliptic/ round	yellow	straight		white	-	matt	cuboid	flat	very small
116	SBP_133	CAPRICE	10.18730/SC2GY	commercial	R	R	R	S	S	S		determinate erect	white	white		medium	eight	green	straight		white	-	matt	cuboid	round	small
117	SBP_135	DELINEL	10.18730/SC2HZ	commercial	R	R	S	I	S	I		determinate postrate	purple	purple		medium	eight	green	curved		black	-	shiny	oblong cylindric	round	small
118	SBP_136	CROSSER	10.18730/SC2J*	commercial	R	R	R	S	S	S		determinate erect	white	white		Short	eliptic/ round	green	straight		white	-	matt	cuboid	round	very small
119	SBP_137	DENVER	10.18730/SC2K~	commercial	R	R	R	S	I	S		determinate erect	white	white		Short	eliptic/ round	green	curved		white	-	matt	oblong cylindric	round	very small
120	SBP_138	DEXTER	10.18730/SC2M$	commercial	R	R	R	S	I	S		determinate erect	white	white		Short	eight	green	straight		white	-	matt	oblong cylindric	round	very small
121	SBP_140	ECLAREL	10.18730/SC2N=	commercial	R	R	R	I	S	-		determinate postrate	purple	purple		medium	eliptic/ round	green	curved		black	-	shiny	oblong cylindric	round	medium
122	SBP_141	EXPER	10.18730/SC2PU	commercial	-	R	-	S	-	S		determinate erect	white	white		Short	eliptic/ round	green	straight		white	-	matt	cuboid	round	very small
123	SBP_142	FLANKER	10.18730/SC2Q0	commercial	R	R	R	S	S	S		determinate erect	white	white		Short	eliptic/ round	green	straight		white	-	medium	cuboid	round	very small
124	SBP_143	GOLDITO	10.18730/SC2R1	commercial	R	R	S	I	S	S		determinate postrate	white	white		medium	pear	yellow	curved		white	-	matt	cuboid	round	small
125	SBP_144	GOURMANDEL	10.18730/SC2S2	commercial	R	R	S	I	S	S		determinate erect	purple	purple		long	eliptic/ round	green	curved		black	-	shiny	oblong cylindric	round	small
126	SBP_145	JOGGER	10.18730/SC2T3	commercial	R	R	R	S	R	S		determinate erect	white	white		medium	eight	green	straight		white	-	matt	oval	round	very small
127	SBP_146	JUMPER	10.18730/SC2V4	commercial	R	R	R	S	S	S		determinate -	white	white		Short	eight	green	straight		white	-	medium	cuboid	round	very small
128	SBP_147	KAISER	10.18730/SC2W5	commercial	R	R	R	S	S	S		determinate -	white	white		medium	eight	green	straight		white	-	medium	cuboid	round	small
129	SBP_148	KIFER	10.18730/SC2X6	commercial	R	R	R	S	S	S		determinate erect	white	white		Short	eliptic/ round	green	straight		white	-	matt	oblong cylindric	round	very small
130	SBP_150	OREO	10.18730/SBC9P	commercial	R	R	R	S	I	S		determinate erect	white	white		Short	pear	yellow	straight		white	-	matt	cuboid	round	very small
131	SBP_151	OXINEL	10.18730/SC2Y7	commercial	R	R	S	I	S	I		determinate climbing	lilac	lilac		Very long	eight	green	curved		dark brown	-	matt	oblong cylindric	round	very small
132	SBP_152	POLDER	10.18730/SC2Z8	commercial	S	S	S	I	S	S		determinate erect	white	white		Short	eliptic/ round	green	straight		white	-	matt	cuboid	round	very small
133	SBP_153	PRIMEL	10.18730/SC309	commercial	S	S	S	I	S	R		determinate postrate	lilac	lilac		long	eight	green	straight		dark brown	-	shiny	oblong cylindric	flat	large
134	SBP_154	PUNCHER	10.18730/SC31A	commercial	R	R	S	I	-	S		determinate erect	white	white		medium	eliptic/ round	green	curved		white	-	matt	cuboid	round	small
135	SBP_155	REPORTER	10.18730/SC32B	commercial	R	R	R	S	S	S		determinate erect	white	white		Short	eight	green	straight		white	-	matt	oblong cylindric	round	very small
136	SBP_156	ROADSTER	10.18730/SC33C	commercial	R	R	R	S	I	S		determinate erect	white	white		medium	eight	green	straight		white	-	matt	oblong cylindric	round	very small
137	SBP_157	SORIA	10.18730/SC34D	commercial	S	S	S	S	I	S		determinate erect	white	white		medium	eliptic/ round	green	straight		white	-	matt	cuboid	round	small
138	SBP_158	SUNDANCE	10.18730/SC35E	commercial	R	R	R	S	S	S		determinate erect	white	white		medium	eliptic/ round	yellow	straight		white	-	matt	cuboid	round	small
139	SBP_160	TAUSI	10.18730/SC36F	commercial	S	S	S	I	R	S		determinate erect	white	white		medium	eliptic/ round	green	straight		white	-	matt	cuboid	round	small
140	SBP_161	VANILLA	10.18730/SC37G	commercial	S	S	S	S	I	S		determinate erect	white	white		long	eliptic/ round	green	curved		white	-	shiny	oblong cylindric	round	small
141	SBP_162	VELERO	10.18730/SC38H	commercial	S	S	S	S	S	S		determinate erect	white	white		medium	flat	green	straight		white	-	matt	oval	round	small
142	SBP_163	VEZER	10.18730/SC39J	commercial	R	R	R	S	S	S		determinate erect	white	white		Short	eight	green	curved		white	-	matt	oblong cylindric	round	very small
143	SBP_164	WALKER	10.18730/SBCBR	commercial	R	-	R	S	S	S		determinate -	white	white		medium	eliptic/ round	green	straight		white	-	matt	oblong cylindric	round	small
144	SBP_165	CALYPSO	10.18730/SC3AK	commercial	R	R	S	I	S	S		determinate postrate	white	white		long	eliptic/ round	green	re-curved		dark brown	cream	shiny	oblong cylindric	round	medium
145	SBP_166	MARBEL	10.18730/SC3BM	commercial	R	R	S	I	I	I		determinate postrate	purple	purple		Very long	pear	mottled green	straight		cream	dark brown	shiny	oblong cylindric	round	medium
146	SBP_167	SKIPPER	10.18730/SC3CN	commercial	R	R	R	S	I	S		determinate erect	white	white		medium	eight	green	straight		dark brown	-	matt	oblong cylindric	round	very small
147	SBP_168	VILBEL	10.18730/SC3DP	commercial	R	R	S	-	S	I		determinate erect	purple	purple		long	eight	green	re-curved		black	-	shiny	kidney	round	small
148	SBP_169	ALLEGRO	10.18730/SC3EQ		R	R	R	S	I	S		determinate -	white	white		medium	pear	green	straight		white	-	matt	oblong cylindric	round	small
149	SBP_173	BRELAN	10.18730/SC3FR		R	R	R	I	S	S		determinate erect	white	white		Short	eight	green	straight		white	-	matt	cuboid	round	small
150	SBP_174	CARLIN	10.18730/SC3GS		R	R	R	S	S	S		determinate erect	white	white		Short	eight	green	straight		white	-	matt	oval	round	small
151	SBP_175	FRONTA	10.18730/SC3HT		R	R	R	I	S	S		determinate postrate	white	white		Short	eight	green	straight		white	-	matt	cuboid	round	small
152	SBP_177	GREEN ISLE	10.18730/SC3JV		S	S	S	S	S	S		determinate erect	white	white		Short	eight	green	straight		white	-	shiny	cuboid	round	small
153	SBP_178	GREEN TOP	10.18730/SC3KW		S	R	S	S	S	S		determinate erect	white	white		medium	eight	green	straight		white	-	shiny	kidney	round	small
154	SBP_179	GRIS DEUIL	10.18730/SC3MX		S	S	S	S	S	R		determinate postrate	purple	purple		Short	pear	mottled green	straight		cream	dark brown	shiny	cuboid	round	medium
155	SBP_180	IMPROVED_SUPER	10.18730/SC3NY		S	S	S	I	S	S		determinate postrate	purple	purple		medium	eight	green	straight		dark brown	cream	shiny	cuboid	round	medium
156	SBP_182	LARO	10.18730/SC3PZ		R	R	S	S	S	S		determinate erect	white	white		Short	eight	green	straight		white	-	matt	cuboid	round	small
157	SBP_183	LUMINEL	10.18730/SC3Q*		R	R	R	S	S	S		determinate erect	white	white		medium	eight	green	straight		white	-	matt	cuboid	round	small
158	SBP_184	MARGELIN	10.18730/SC3R~		R	R	S	I	S	S		determinate erect	purple	purple		medium	pear	green	straight		black	-	shiny	kidney	flat	medium
159	SBP_186	MITARNEL	10.18730/SC3S$		R	R	S	I	I	I		determinate erect	purple	purple		Very long	pear	mottled green	straight		cream	dark brown	shiny	oblong cylindric	flat	medium
160	SBP_187	NOBLESSA	10.18730/SC3T=		R	R	R	I	S	S		determinate -	white	white		Short	eight	green	straight		white	-	medium	kidney	round	small
161	SBP_188	OKTAVO	10.18730/SC3VU		R	R	R	S	S	S		determinate erect	white	white		Short	eight	green	straight		white	-	matt	cuboid	round	small
162	SBP_189	PASTEL	10.18730/SC3W0		R	R	R	-	S	S		determinate erect	white	white		medium	pear	green	curved		white	-	medium	cuboid	round	medium
163	SBP_190	PEPITA	10.18730/SC3X1		R	R	R	S	R	S		determinate postrate	white	white		Short	eliptic/ round	green			white	-	medium	oval	round	small
164	SBP_191	PICO	10.18730/SC3Y2		R	R	R	I	S	S		determinate postrate	white	white		Short	eliptic/ round	green			white	-	medium	cuboid	round	small
165	SBP_192	PIROL	10.18730/SC3Z3		S	S	S	I	S	S		determinate erect	white	white		Short	eliptic/ round	green	straight		white	-	medium	cuboid	round	small
166	SBP_193	PISSARO	10.18730/SC404		R	R	R	S	R	S		determinate erect	white	white		Short	pear	green	straight		white	-	matt	cuboid	round	medium
167	SBP_194	PRELUDE SANS FIL	10.18730/SC415		R	R	R	S	S	S		determinate postrate	white	white		Short	pear	green	curved		white	-	medium	kidney	round	small
168	SBP_195	PRESIDENT	10.18730/SC426		R	R	R	I	I	S		determinate postrate	white	white		Short	pear	green	straight		white	-	matt	oval	round	small
169	SBP_197	RONDELLE	10.18730/SC437		R	R	R	S	S	S		determinate postrate	white	white		Short	eight	green	straight		white	-	matt	truncate	round	small
170	SBP_198	SABA	10.18730/SC448		R	R	S	I	S	S		determinate postrate	white	white		medium	pear	green	straight		white	-	shiny	kidney	round	medium
171	SBP_200	SAXARES	10.18730/SC459		R	R	R	S	I	I		determinate erect	lilac	lilac		Short	eight	green	straight		cream	-	shiny	truncate	flat	small
172	SBP_201	SIMARES	10.18730/SC46A		R	R	R	S	I	S		determinate postrate	white	white		Short	pear	green	straight		white	-	matt	oval	round	small
173	SBP_203	DE MORIONVILLE	10.18730/SC47B		S	S	S	S	S	S		determinate erect	white	white		medium	flat	yellow	curved		white	brown	medium	cuboid	round	medium
174	SBP_204	GILADEAU	10.18730/SC48C		S	S	S	I	S	S		determinate erect	purple	purple		medium	pear	mottled green	curved		cream	dark brown	shiny	oblong cylindric	round	large
175	SBP_209	PIERROT	10.18730/SC49D		R	R	R	S	R	S		determinate postrate	white	white		Short	pear	green	straight		white	-	medium	oval	round	small
176	SBP_210	PITAR	10.18730/SC4AE		R	R	R	S	R	S		determinate erect	white	white		Short	pear	green	straight		white	-	shiny	oval	round	small
177	SBP_211	PRINCO	10.18730/SC4BF		R	R	R	S	R	S		determinate erect	white	white		Short	eight	green	straight		white	-	shiny	oval	round	small
178	SBP_212	PRINLADE	10.18730/SC4CG		S	R	S	S	S	S		determinate erect	white	white		Short	eight	green	straight		white	-	shiny	oval	round	small
179	SBP_213	PRINSTALITE	10.18730/SC4DH		R	R	R	S	S	S		determinate erect	white	white		medium	flat	yellow	straight		white	-	matt	kidney	round	small
180	SBP_217	SLENDERGREEN	10.18730/SC4EJ		S	R	R	S	I	S		determinate erect	white	white		Short	pear	green	straight		white	-	medium	oval	round	small
181	SBP_219	ALMERE	10.18730/SC4FK		R	R	S	I	S	S		determinate erect	white	white		Short	eight	green	straight		white	-	medium	cuboid	round	small
182	SBP_220	ALTERNOR	10.18730/SC4GM		R	R	R	S	I	S		determinate -	white	white		Short	eliptic/ round	green			white	-	matt	oval	round	small
183	SBP_221	BELAMI	10.18730/SC4HN		R	R	R	I	S	S		determinate erect	white	white		Short	eliptic/ round	green	straight		white	-	matt	oval	round	small
184	SBP_223	HARVESTER	10.18730/SBC2F		R	R	R	S	S	S		determinate erect	white	white		Short	eliptic/ round	green	straight		white	-	medium	kidney	round	small
185	SBP_224	IPRIN	10.18730/SC4JP		R	R	R	I	S	S		determinate erect	white	white		Short	eight	green	straight		white	-	matt	oval	round	small
186	SBP_226	PETRA	10.18730/SC4KQ		R	R	R	I	S	S		determinate erect	white	white		medium	pear	green	straight		white	-	matt	kidney	round	medium
187	SBP_227	PHOENIX	10.18730/SC4MR		S	S	S	S	I	I		determinate erect	white	white		Short	eight	green	straight		purple	-	shiny	kidney	round	large
188	SBP_228	PLUTEX	10.18730/SC4NS		R	R	R	I	S	S		determinate erect	white	white		Short	eight	green	straight		white	-	shiny	oval	round	small
189	SBP_230	PRESTINOE	10.18730/SC4PT		R	R	R	I	S	S		determinate erect	white	white		Short	pear	green	straight		white	-	shiny	cuboid	round	small
190	SBP_231	SALIA	10.18730/SC4QV		R	R	S	S	S	S		determinate erect	white	white		medium	eliptic/ round	green	straight		white	-	matt	oval	round	medium
191	SBP_232	SCORE	10.18730/SC4RW		R	R	R	S	S	S		determinate erect	white	white		Short	eliptic/ round	green	straight		white	-	medium	oval	round	small
192	SBP_233	SILVERT	10.18730/SC4SX		R	R	S	S	S	S		determinate erect	white	white		medium	eliptic/ round	green	straight		white	-	medium	cuboid	round	medium
193	SBP_234	SIMONEX	10.18730/SC4TY		R	-	R	-	S	S		determinate -	white	white		Short	eliptic/ round	green	-		white	-	matt	cuboid	round	small
194	SBP_235	MAXIDOR	10.18730/SC4VZ		R	R	S	S	S	S		determinate erect	white	white		medium	eliptic/ round	yellow	straight		white	-	medium	kidney	round	small
195	SBP_236	ORNEL	10.18730/SC4W*		R	R	R	S	S	S		determinate erect	white	white		medium	eliptic/ round	yellow	straight		white	-	shiny	kidney	round	small
196	SBP_237	SEMIDOR	10.18730/SC4X~		R	R	S	S	S	S		determinate erect	white	white		medium	pear	yellow	straight		white	-	matt	kidney	round	small
197	SBP_239	MENIL	10.18730/SC4Y$		R	R	S	I	S	S		determinate erect	purple	purple		medium	eight	mottled green	curved		cream	dark brown	medium	oblong cylindric	round	large
198	SBP_240	PRENEL	10.18730/SC4Z=		R	R	R	I	R	S		determinate erect	white	white		Short	pear	green	curved		white	-	medium	oval	round	small
199	SBP_242	ROMULUS	10.18730/SC50U		R	R	S	S	S	S		determinate erect	purple	purple		Very long	eight	mottled green	straight		cream	dark brown	medium	oblong cylindric	round	large
200	SBP_243	ARAMIS	10.18730/SC510		R	R	S	S	S	I		determinate erect	purple	purple		long	eight	green	straight		dark brown	cream	medium	oblong cylindric	round	medium
201	SBP_244	JANUS	10.18730/SC521		R	R	S	I	S	S		determinate postrate	purple	purple		Very long	eight	green	straight		black	-	shiny	oblong cylindric	round	medium
202	SBP_245	TALISMAN	10.18730/SC532		R	R	R	S	S	S		determinate postrate	lilac	lilac		Very long	eight	green	curved		brown	cream	medium	oblong cylindric	round	medium
203	SBP_246	FRINGANT	10.18730/SC543		R	R	S	S	I	S		determinate erect	white	white		medium	eight	green	straight		cream	white	shiny	oblong cylindric	round	medium
204	SBP_248	MIRY	10.18730/SC554		R	R	S	S	S	S		determinate postrate	purple	purple		medium	eight	green	curved		black	-	shiny	kidney	round	medium
205	SBP_249	PURENEL	10.18730/SC565		R	R	S	S	S	I		determinate erect	lilac	lilac		medium	eight	yellow	straight		dark brown	-	shiny	kidney	round	medium
206	SBP_250	RELIMAX	10.18730/SC576		R	R	S	S	S	S		determinate erect	white	white		Short	eliptic/ round	yellow	straight		white	dark brown	matt	kidney	round	small
207	SBP_251	SACONEL	10.18730/SC587		R	R	R	S	S	S		determinate erect	lilac	lilac		medium	eight	green	curved		cream	-	shiny	kidney	round	medium
208	SBP_252	SAXA	10.18730/SC598		S	S	-	-	-	-		determinate -	white	white		medium	flat	green	-		-	-	-	-	-	-
209	SBP_253	MICHENEL	10.18730/SC5A9		R	R	R	I	S	S		determinate erect	white	white		medium	eliptic/ round	green	straight		white	-	matt	cuboid	round	small
210	SBP_255	NEGRITAL	10.18730/SC5BA	commercial	S	S	S	I	S	I		Indeterminate climbing	purple	purple		Very long	eight	green	re-curved		black	-	shiny	oblong cylindric	round	medium
211	SBP_256	AIGUILLON	10.18730/SC5CB	commercial	R	R	S	S	S	I		determinate erect	purple	purple		long	eliptic/ round	green	straight		black	-	shiny	oblong cylindric	round	medium
212	SBP_257	KRYPTON	10.18730/SC5DC	commercial	R	R	R	I	S	S		determinate erect	white	white		Short	eight	green	straight		white	-	shiny	cuboid	round	very small
213	SBP_258	GALION	10.18730/SC5ED	commercial	R	R	R	I	S	S		determinate erect	white	white		long	eight	green	straight		white	-	shiny	cuboid	round	very small
214	SBP_259	PONGO	10.18730/SC5FE	commercial	R	R	S	S	S	I		determinate erect	purple	purple		medium	eight	green	curved		black	-	shiny	oblong cylindric	round	small
215	SBP_260	VESPERAL	10.18730/SC5GF	commercial	S	S	S	S	S	S		Indeterminate climbing	purple	purple		Very long	eight	green	curved		black	-	shiny	kidney	round	medium
216	SBP_262	IRAGO	10.18730/SC5HG	commercial	R	R	S	I	S	S		determinate erect	purple	purple		medium	eight	green	curved		black	-	shiny	kidney	round	medium
217	SBP_263	TALGO	10.18730/SC5JH	commercial	S	S	R	S	S	S		determinate postrate	white	white		long	eight	green	curved		dark brown	-	shiny	kidney	round	medium
218	SBP_264	STENTOR	10.18730/SC5KJ	commercial	R	R	S	S	S	S		determinate erect	purple	purple		long	eliptic/ round	yellow	re-curved		black	-	shiny	oblong cylindric	round	medium
219	SBP_265	MAJOR	10.18730/SC5MK	commercial	R	R	S	S	S	S		determinate erect	purple	purple		long	eliptic/ round	yellow	curved		black	-	shiny	oblong cylindric	round	medium
220	SBP_266	PASTORAL	10.18730/SC5NM	commercial	R	R	S	S	S	-		Indeterminate climbing	purple	purple		Very long	eliptic/ round	green	straight		dark brown	-	shiny	kidney	round	medium
221	SBP_267	ROBIN	10.18730/SC5PN	commercial	R	R	R	I	I	S		Indeterminate climbing	white	white		Very long	flat	green	straight		white	-	matt	kidney	round	medium
222	SBP_268	ZEPELIN	10.18730/SC5QP	commercial	S	S	S	I	S	S		Indeterminate climbing	white	white		Very long	flat	green	straight		white	-	matt	kidney	round	medium
223	SBP_269	AR_ARNO	10.18730/SC5RQ	commercial	S	S	S	I	-	S		determinate erect	purple	purple		long	eliptic/ round	green	curved		white	-	matt	oblong cylindric	round	small
224	SBP_270	MINIDOR	10.18730/SC5SR	commercial	S	S	S	S	I	S		determinate erect	white	white		long	eliptic/ round	yellow	straight		dark brown	cream	shiny	kidney	round	large
225	SBP_271	GINEVRA	10.18730/SC5TS	commercial	R	R	S	I	S	S		determinate erect	purple	purple		Very long	pear	green	curved		black	-	shiny	oblong cylindric	round	medium
226	SBP_273	GRENADA	10.18730/SC5VT	commercial	-	-	R	S	R	S		determinate erect	white	white		long	eight	green	straight		white	-	medium	oblong cylindric	round	very small
227	SBP_274	TEMA	10.18730/SC5WV	commercial	S	S	S	S	S	S		determinate erect	white	white		medium	pear	green	straight		dark brown	-	shiny	kidney	round	medium
228	SBP_276	SUPERNANO GIALLO	10.18730/SC5XW	commercial	S	S	S	I	S	I		determinate erect	purple	purple		Short	flat	yellow	straight		black	-	shiny	oval	round	medium
229	SBP_277		10.18730/SC5YX		S	S	S	S	S	I		determinate erect	purple	purple		Short	eliptic/ round	yellow	straight		black	-	shiny	oval	round	medium
230	SBP_278	HIRUNA	10.18730/SC5ZY		S	S	S	S	S	R		determinate erect	lilac	lilac		medium	flat	yellow	straight		dark brown	cream	shiny	kidney	flat	large
231	SBP_279		10.18730/SC60Z		S	S	S	S	S	R		determinate erect	purple	purple		Short	flat	mottled green	straight		cream	dark brown	medium	oval	flat	medium
232	SBP_280		10.18730/SC61*		S	R	S	S	S	I		determinate erect	lilac	lilac		medium	flat	green	straight		cream	-	matt	kidney	flat	very large
233	SBP_283		10.18730/SC62~		R	S	S	S	S	S		determinate erect	lilac	lilac		medium	flat	green	straight		purple	-	matt	kidney	flat	large
234	SBP_284	SALVICA	10.18730/SC63$		R	R	S	I	S	I		determinate erect	purple	purple		long	pear	yellow	curved		black	-	shiny	cuboid	round	medium
235	SBP_285		10.18730/SC64=		R	R	R	S	S	S		determinate erect	white	white		medium	eight	yellow	straight		white	-	medium	cuboid	round	small
236	SBP_287	WIDUSA	10.18730/SBC4H	breeding line	R	R	R	S	I	S		determinate erect	white	white		Short	pear	green	straight		white	-	matt	oval	round	small
237	SBP_288	La Victorie	10.18730/SBB9V	old variety	S	S	S	S	S	S		determinate erect	purple	purple		medium	pear	green	straight		black	-	matt	oblong cylindric	round	medium
238	SBP_289	TENDERGREEM	10.18730/SBBV8	old variety	S	S	S	I	S	I		determinate erect	purple	purple		medium	eight	green	straight		dark brown	cream	medium	kidney	round	medium
239	SBP_291	Improved Tendergreen	10.18730/SC65U	commercial	S	S	S	R	S	S		determinate erect	lilac	lilac		medium	eliptic/ round	green	straight		dark brown	cream	medium	kidney	flat	medium
240	SBP_292	Topcrop	10.18730/SC660	commercial	S	S	S	S	S	S		determinate postrate	lilac	lilac		medium	eliptic/ round	green	curved		dark brown	cream	medium	kidney	flat	medium
241	SBP_293	MESSI	10.18730/SC671	commercial	R	R	S	S	S	S		determinate erect	white	white		long	eight	green	straight		white	-	medium	kidney	round	small
242	SBP_295	MOONSTONE	10.18730/SC682	commercial	S	S	S	S	S	S		determinate erect	white	white		medium	eight	green	curved		white	-	medium	oblong cylindric	round	small
243	SBP_296	BALTIMORE	10.18730/SC693	commercial	R	R	R	S	I	S		determinate -	lilac	lilac		medium	pear	green	straight		white	-	matt	kidney	round	small
244	SBP_297	CHICA	10.18730/SC6A4	commercial	R	R	R	S	S	S		determinate erect	white	white		Short	eliptic/ round	green	curved		white	-	matt	oblong cylindric	round	very small
245	SBP_298	KYSIA	10.18730/SC6B5	commercial	R	R	R	S	S	S		determinate erect	white	white		Short	eliptic/ round	green	straight		white	-	matt	oblong cylindric	round	very small
246	SBP_299	ORIENTE	10.18730/SC6C6	commercial	S	R	S	R	S	S		Indeterminate erect	white	white		Very long	flat	green	straight		white	-	matt	kidney	flat	large
247	SBP_300	RIMEMBER	10.18730/SC6D7	commercial	R	R	R	S	S	S		determinate erect	white	white		medium	eliptic/ round	green	straight		white	-	matt	oblong cylindric	round	small
248	SBP_301	SYBARIS	10.18730/SC6E8	unknown	S	S	S	-	R	S		determinate erect	white	white		medium	eliptic/ round	green	straight		white	-	medium	cuboid	round	small
249	SBP_302		10.18730/SC6F9	unknown	R	R	S	-	R	S		determinate erect	white	white		medium	eight	green	straight		white	-	matt	cuboid	round	small
250	SBP_303		10.18730/SC6GA	unknown	R	S	S	R	I	S		Indeterminate climbing	lilac	lilac		Short	flat	yellow	straight		dark brown	-	shiny	oval	round	medium
251	SBP_304		10.18730/SC6HB	unknown	S	S	S	R	I	S		Indeterminate climbing	purple	purple		medium	flat	green	straight		black	-	medium	cuboid	round	medium
252	SBP_305		10.18730/SC6JC	unknown	S	S	S	R	I	I		Indeterminate erect	purple	purple		medium	flat	yellow	straight		black	-	matt	oval	round	medium
253	SBP_306		10.18730/SC6KD	unknown	S	S	S	R	I	I		Indeterminate erect	purple	purple		medium	flat	green	straight		dark brown	-	shiny	oval	round	medium
254	SBP_307		10.18730/SC6ME	unknown	R	S	S	R	I	I		Indeterminate climbing	lilac	lilac		medium	flat	green	straight		dark brown	-	shiny	oval	round	medium
255	SBP_308		10.18730/SC6NF	unknown	S	S	S	I	S	I		Indeterminate climbing	purple	purple		Short	flat	yellow	straight		black	-	medium	oval	round	small
256	SBP_311		10.18730/SC6PG	unknown	S	S	S	I	S	I		Indeterminate erect	lilac	lilac		Short	flat	yellow	straight		cream	-	shiny	oval	round	medium
257	SBP_312		10.18730/SC6QH	unknown	S	S	S	R	I	R		Indeterminate climbing	purple	purple		Short	flat	green	straight		dark brown	-	shiny	oval	round	large
258	SBP_314		10.18730/SC6RJ	unknown	S	S	S	R	S	I		Indeterminate climbing	white	white		medium	flat	green	curved		white	-	shiny	kidney	flat	large
259	SBP_315		10.18730/SC6SK	unknown	S	S	S	I	I	I		Indeterminate climbing	lilac	lilac		Short	flat	yellow	straight		brown	-	shiny	oval	round	large
260	SBP_316		10.18730/SC6TM	unknown	R	S	R	R	I	S		Indeterminate climbing	purple	purple		Short	flat	yellow	straight		black	-	matt	oval	round	medium
261	SBP_317		10.18730/SC6VN	unknown	S	S	S	R	S	I		Indeterminate climbing	purple	purple		Short	flat	green	straight		black	-	shiny	oval	round	medium
262	SBP_318		10.18730/SC6WP	unknown	R	R	R	I	S	I		determinate erect	white	white		Short	flat	green	straight		brown	-	medium	oval	round	small
263	SBP_319		10.18730/SC6XQ	unknown	S	S	S	I	S	I		Indeterminate climbing	white	white		Very long	pear	yellow	re-curved		white	-	matt	kidney	flat	medium
264	SBP_320		10.18730/SC6YR	unknown	S	S	S	R	I	R		Indeterminate climbing	purple	purple		Short	flat	green	curved		black	-	shiny	cuboid	flat	small
265	SBP_321		10.18730/SC6ZS	unknown	S	S	S	S	S	I		determinate -	white	white		medium	eight	green	curved		brown	cream	shiny	kidney	round	medium
266	SBP_322		10.18730/SC70T	unknown	S	S	S	I	S	S		determinate erect	white	white		medium	eliptic/ round	yellow	curved		white	-	matt	kidney	flat	medium
267	SBP_324		10.18730/SC71V	unknown	R	S	R	I	I	S		determinate -	white	white		medium	eliptic/ round	green	curved		white	-	matt	kidney	flat	medium
268	SBP_325		10.18730/SC72W	unknown	S	S	S	-	S	S		determinate -	purple	purple		medium	pear	green	curved		cream	brown	medium	kidney	round	large
269	SBP_326		10.18730/SC73X	unknown	S	-	-	-	-	S		determinate -	white	white		medium	eliptic/ round	yellow	straight		white	-	matt	cuboid	round	very small
270	SBP_328		10.18730/SC74Y	unknown	S	S	R	I	S	I		determinate -	lilac	lilac		Short	flat	yellow	curved		brown	-	medium	oval	round	medium
271	SBP_329		10.18730/SC75Z	unknown	S	S	S	I	S	I		determinate postrate	lilac	lilac		medium	eliptic/ round	green	straight		dark brown	cream	shiny	cuboid	round	medium
272	SBP_330		10.18730/SC76*	unknown	S	-	S	S	I	I		determinate -	white	white		medium	flat	green	straight		cream	purple	medium	oval	flat	medium
273	SBP_331		10.18730/SC77~	unknown	R	S	S	-	I	R		Indeterminate climbing	lilac	lilac		medium	pear	yellow	straight		dark brown	-	shiny	oval	round	medium
274	SBP_332		10.18730/SC78$	unknown	S	S	S	I	S	I		Indeterminate climbing	purple	purple		medium	flat	yellow	straight		black	-	shiny	oval	round	medium
275	SBP_333		10.18730/SC79=	unknown	R	S	R	R	S	I		Indeterminate climbing	purple	purple +		Short	flat	green	straight		black	-	matt	oval	flat	medium
276	SBP_334		10.18730/SC7AU	unknown	R	S	S	R	I	I		Indeterminate climbing	purple	purple		Short	flat	yellow	straight		black	-	matt	oval	flat	medium
277	SBP_335		10.18730/SC7B0	unknown	S	S	S	I	S	R		Indeterminate climbing	lilac	lilac		medium	flat	yellow	straight		brown	-	medium	oval	round	medium
278	SBP_336		10.18730/SC7C1	unknown	S	S	S	I	S	I		determinate erect	lilac	lilac		medium	flat	yellow	curved		brown	-	medium	oval	round	medium
279	SBP_340		10.18730/SC7D2	unknown	S	S	S	I	S	R		Indeterminate climbing	lilac	lilac		medium	flat	yellow	straight		brown	-	medium	oval	round	medium
280	SBP_341		10.18730/SC7E3	unknown	S	S	S	I	I	S		Indeterminate climbing	purple	purple		medium	flat	yellow	straight		black	-	matt	oval	flat	medium
281	SBP_343		10.18730/SC7F4	unknown	R	S	S	I	S	S		Indeterminate climbing	purple	purple		medium	flat	mottled green	straight		cream	dark brown	medium	kidney	round	large
282	SBP_344		10.18730/SC7G5	unknown	S	S	S	I	S	R		determinate erect	lilac	lilac		medium	flat	green	straight		cream	purple	shiny	kidney	flat	medium
283	SBP_345		10.18730/SC7H6	unknown	R	R	S	I	S	I		determinate -	lilac	lilac		medium	eight	green	straight		dark brown	cream	medium	kidney	flat	large
284	SBP_346		10.18730/SC7J7	unknown	S	S	S	-	S	S		determinate postrate	purple	purple		medium	flat	yellow	straight		brown	-	medium	oval	round	medium
285	SBP_347		10.18730/SC7K8	unknown	S	S	S	I	S	S		Indeterminate climbing	lilac	lilac		Short	flat	yellow	straight		brown	-	medium	oval	round	medium
286	SBP_350	MARCHÉ DE VULLY	10.18730/SC7M9	landrace	S	S	S	I	S	I		determinate -	purple	purple		medium	eight	green	straight		purple	-	shiny	kidney	round	medium
287	SBP_351	ROI DES BEURRES	10.18730/SC7NA	commercial	S	S	S	I	S	S		determinate -	white	white		medium	eliptic/ round	yellow	straight		white	-	matt	cuboid	round	medium
288	SBP_352	FIN DE BAGNOLS	10.18730/SC7PB	commercial	S	S	S	I	S	R		determinate postrate	lilac	lilac		medium	pear	green	straight		purple	cream	medium	kidney	round	medium
289	SBP_355	SLENDERWAX	10.18730/SC7QC	commercial	R	R	S	I	S	S		determinate -	white	white		medium	eliptic/ round	yellow	straight		white	-	matt	kidney	round	small
290	SBP_356	WUNDERFEIN SELEKTION Z	10.18730/SC7RD	commercial	R	R	R	I	S	S		determinate erect	white	white		Short	eliptic/ round	green	straight		white	-	matt	cuboid	round	small
291	SBP_357	ODESSA (WUNDERFEIN)	10.18730/SC7SE	commercial	R	R	R	S	S	S		determinate erect	white	white		Short	eliptic/ round	green	straight		white	-	matt	cuboid	round	small
292	SBP_358	BENEVENTO	10.18730/SC7TF	landrace	S	S	S	S	S	I		determinate erect	purple	purple		Very long	pear	green	curved		cream	brown	shiny	kidney	flat	large
293	SBP_359	BROWN SWISS	10.18730/SC7VG	landrace	S	S	S	S	S	I		determinate -	white	white		medium	eliptic/ round	green	curved		dark brown	-	matt	kidney	round	medium
294	SBP_360	EINKORNBOHNE	10.18730/SC7WH	landrace	R	S	S	I	S	I		determinate erect	lilac	lilac		Very long	flat	green	straight		purple	cream	shiny	kidney	flat	medium
295	SBP_361	ENFANT DE MONT CALME	10.18730/SC7XJ	landrace	S	S	S	S	S	S		determinate -	white	white		Short	pear	green	curved		white	dark brown	matt	cuboid	round	medium
296	SBP_362	EMPEREUR DE RUSSIE	10.18730/SC7YK	landrace	S	S	S	I	S	R		determinate erect	lilac	lilac		Very long	flat	green	straight		purple	cream	matt	kidney	round	large
297	SBP_363	GARTENGLÜCK	10.18730/SC7ZM	landrace	S	S	S	S	S	R		determinate erect	purple	purple		medium	pear	green	curved		black	cream	shiny	kidney	round	large
298	SBP_364	GOLDEN BUTTER	10.18730/SC80N	landrace	S	S	S	I	S	I		Indeterminate erect	purple	purple		Short	flat	yellow	straight		black	-	shiny	oval	round	small
299	SBP_365	GELBHÜLSIGE	10.18730/SC81P	landrace	R	R	-	-	S	S		determinate erect	white	white		long	pear	yellow	straight		white	-	matt	oval	round	small
300	SBP_366	HUNDERT FÜR EINE	10.18730/SC82Q	landrace	S	R	R	I	S	I		determinate -	white	white		Short	flat	green	straight		brown	-	shiny	cuboid	round	small
301	SBP_367	IDEAL DIETIKON	10.18730/SC83R	landrace	R	S	S	S	S	R		determinate erect	purple	purple		Short	pear	green	straight		black	-	shiny	kidney	round	medium
302	SBP_369	MARCHÉ DES TROIS CHÊNES	10.18730/SC84S	landrace	S	S	S	I	S	S		determinate erect	white	white		medium	eight	green	straight		white	-	matt	cuboid	round	medium
303	SBP_371	MARCHÉ DE GENÈVE	10.18730/SC85T	landrace	S	R	S	I	S	I		determinate erect	purple	purple		long	eliptic/ round	green	straight		black	-	matt	cuboid	round	medium
304	SBP_372	MAKEDONISCHE	10.18730/SC86V	landrace	R	R	S	I	I	R		determinate postrate	purple	purple		medium	flat	yellow	straight		black	-	shiny	oval	round	small
305	SBP_373	OKTOBERLI	10.18730/SC87W	landrace	S	S	S	S	S	I		Indeterminate -	purple	purple		Short	eliptic/ round	green	straight		black	cream	shiny	kidney	round	large
306	SBP_374	RED VALENTINE	10.18730/SC88X	landrace	S	S	S	S	S	R		determinate postrate	lilac	lilac		Short	pear	green	straight		red	cream	medium	kidney	flat	large
307	SBP_375	PROCESSOR ORDER SABO	10.18730/SC89Y	landrace	S	S	S	S	S	S		determinate erect	white	white		medium	pear	green	curved		white	-	matt	cuboid	round	small
308	SBP_377	VON BOSWIL	10.18730/SC8AZ	landrace	S	S	S	S	S	I		determinate -	purple	purple		medium	pear	green	curved		black	cream	shiny	kidney	round	large
309	SBP_378	WICHINGEN	10.18730/SC8B*	landrace	R	R	S	I	S	R		determinate erect	purple	purple		long	eight	green	straight		black	-	shiny	kidney	round	medium
310	SBP_381	RABE	10.18730/SC8C~	landrace	S	S	R	I	S	I		determinate postrate	purple	purple		medium	eight	green	straight		black	-	shiny	cuboid	round	medium
311	SBP_382	PETIT RIZ	10.18730/SC8D$	landrace	S	S	R	S	S	I		Indeterminate climbing	white	white		Short	flat	green	straight		white	-	matt	round	round	very small
