# Supplementary material for: Screening for resistance to four fungal diseases and associated genomic regions in a snap bean diversity panel
Source: Front Plant Sci. 2024 Jun 11;15:1386877. doi: 10.3389/fpls.2024.1386877 (PMC11196787; doi:10.3389/fpls.2024.1386877)
Supplement: Supplementary file 2 [file Table_2.xlsx]

## Sheet: Table S2
Supplementary Table S2. List of common bean lines used as a check control in the resistance tests conducted in the Snap Bean Panel against anthracnose, white mold, powdery mildew, and Pythium ultimum. In case the gene conferring resistant in each line is known, it is indicated.
Line	Disease check	resistant gene/s
A195	White mold resistant source/Powdery mildew check	unknown
Porrillo Sintético	Powdery mildew resistant source/Phytium ultimum resistance source	Pm1 (powdery mildew)
Le Victoire	universal susceptible to anthracnose	-
X2776	Powdery mildew check	Pm2
Cornell49242	anthracnose differential cultivar/Phytium ultimum and Powdery mildew resistance source	Co-2 (anthracnose)
TU	anthracnose differential cultivar	Co-5
AB136	anthracnose differential cultivar/ white mold resistant source	Co-5/6
MDRK	anthracnose differential cultivar	Co-1+Co-3
To	anthracnose differential cultivar/PM check	Co-4
Mex222	anthracnose differential cultivar	Co-3
JaloEEP558	anthracnose resistance source	Co-x
G19833	reference sequenced genotype	unknown
BAT93 from Davis	anthracnose resistance source	Co-3/9+Co-u
Xana	Powdery mildew susceptible	-
